# Supplementary material for: Two-dimensional perovskite solar cells with high luminescence and ultra-low open-circuit voltage deficit
Source: Royal Society of Chemistry journal article supplement (doi:10.1039/d0ta08359c), 2020-01-01
Supplement: d0ta08359c1.pdf [file d0ta08359c1.pdf]

## Supporting Information

### Two-dimensional perovskite solar cells with high luminescence and ultra-low open-circuit voltage deficit

Xiaomei Lian<sup>a</sup>, Lijian Zuo<sup>a\*</sup>, Haotian Wu<sup>a</sup>, Guanqing Zhou<sup>b</sup>, Chen Lin<sup>b</sup>, Haiming Zhu<sup>b</sup>, Gang Wu<sup>a\*</sup>, David Cahen<sup>c</sup>, Hongzheng Chen<sup>a\*</sup>

<sup>a</sup>State Key Laboratory of Silicon Materials, MOE Key Laboratory of Macromolecular Synthesis and Functionalization, Department of Polymer Science and Engineering, Zhejiang University, Hangzhou 310027, P. R. China. E-mails: wmang@zju.edu.cn, zjuzlj@zju.edu.cn, hzchen@zju.edu.cn

<sup>b</sup>Department of Chemistry, Zhejiang University, Hangzhou 310027, P. R. China

<sup>c</sup>Bar Ilan Inst. for Nanotechn. & Adv. Materials, BINA & Chem. Dept., Bar Ilan Univ., Ramat Gan, 5290002, Israel

**Keywords:** Quasi-2D perovskite; High luminescence; Open-circuit voltage; Open-circuit voltage deficit; Non-radiative recombination

### Experimental Section

**Materials:** Butylamine hydroiodide (BAI, 99%), phenylethyl-ammonium chloride (PEACl, 99%), phenylethyl-ammonium iodide (PEAI, 99%), (6,6)-Phenyl-C<sub>61</sub>-butyric acid methyl ester (PCBM, 99%), poly[bis(4-phenyl)(2,4,6-trimethylphenyl) amine](PTAA, M<sub>w</sub>: 15000-25000) and PbI<sub>2</sub> (99%) were purchased from Xi'an Polymer. Bathocuproine (BCP, 99%) was purchased from TCI. Methylammonium iodide (MAI, 99%) was purchased from Shanghai Mater Win New Materials. N, N-dimethylformamide (DMF, 99%) was purchased from Alfa Aesar. Formamide (99.5%), chloroform (CF, 99%) and ethyl alcohol (99%) were ordered from Sigma Aldrich. Poly[(9,9-bis(3'-(N,N-diMethyl)-NethyloMMoiniuM-propyl)-2,7-fluorene)-alt-2,7-(9,9-dioctylfluorene)] dibromide (PFN-Br, 99%) was purchased from Solarmer Materials Inc. All reagents and solvents were used directly if not specified.

#### Device fabrication and Characterization:

The ITO coated glass substrates were cleaned sequentially in detergent (Hellmanex III, 2 vol%), deionized water, acetone, and isopropanol in an ultrasonic bath for 15 min, respectively. After that, the substrates were dried in nitrogen flow and cleaned by UV-Ozone treatment for 20 min before use. PTAA HTL was prepared by spin-coating at 4000 rpm for 40 s, and then spin-coated PFN-Br atop of PTAA, followed by annealing at 100 °C for 10 min. BAI, PEACl (or PEAi), MAI, and PbI<sub>2</sub> were mixed by 1.8:0.2:3:4 molar ratio in DMF (with 3% formamide addition) with a concentration of 0.6M (based on PbI<sub>2</sub>). The perovskite precursor solution and PTAA substrates were heated to 70 °C and 100 °C before the spin-coating of the perovskite layer. The spin-coating process started at 4000 rpm for 30 s after dropping the hot precursor to the preheated PTAA substrate, followed by annealing at 100 °C for 15 min. PCBM (5 mg/ml in CF) was spin-coated on the perovskite film at 2000 rpm for 30 s. BCP (0.5 mg/ml in ethyl alcohol) was then spin-coated on PCBM at 3000 rpm for 30 s, followed by a deposition of 100 nm Ag in a vacuum chamber under a high vacuum of 5×10<sup>-4</sup> Pa. The heat-light co-treatment was carried out by annealing the device at temperature of 100 °C, with light intensity of 0.12 mW cm<sup>-2</sup> for 48h.

The photocurrent density-voltage (*J*-*V*) measurement was performed via the solar simulator (SS-F5-3A, Enlitech) along with AM 1.5G spectra whose intensity was calibrated by the certified standard silicon solar cell (SRC-2020, Enlitech) at 100 mV cm<sup>-2</sup>. The effective device pixel area in our case is 0.12 cm<sup>2</sup>, while the devices were tested with an aperture of 0.06 cm<sup>2</sup>. The external quantum efficiency (EQE) data were obtained by using the solar-cell spectral-response measurement system (QE-R, Enlitech). The perovskite solar cells were kept in a humidity-controlled cabinet (Hr = 50 ± 5%, Bossmen, PR1852(A)-SH) for humidity-stability measurement.

The UV-Visible absorption spectra were taken on UV-2450 UV-Vis Shimadzu Spectrophotometer, with the structure of ITO/PTAA/PFN-Br/GA<sub>0.2</sub>BA<sub>1.8</sub>MA<sub>5</sub>Pb<sub>6</sub>I<sub>19</sub>/PCBM. The steady-state PL was taken on an FLS920 from Edinburgh Instruments

and was excited by a Xenon lamp of 470 nm. Crystallographic properties of the perovskite films were investigated under Shimadzu XRD-7000 diffractometer with Cu K $\alpha$  radiation of 0.15406 nm (graphite mono-chromatic) at a scanning rate of 10 ° min<sup>-1</sup>.

**Transient absorption spectroscopy (TAS).** For femtosecond transient absorption spectroscopy, the fundamental output from Yb:KGW laser (1030 nm, 220 fs Gaussian fit, 100 kHz, Light Conversion Ltd) was separated into two light beams. One was introduced to NOPA (ORPHEUS-N, Light Conversion Ltd) to produce a certain wavelength for pump beam (here we use 750 nm), the other was focused onto a YAG plate to generate white light continuum as the probe beam. The pump and probe overlapped on the sample at a small angle less than 10°. The transmitted probe light from the sample was collected by a linear CCD array. Then we obtained transient differential transmission signals by the equation shown below:

$$\frac{\Delta T}{T} = \frac{T_{pump-on} - T_{pump-off}}{T_{pump-off}} \quad (1)$$

We follow Jin's and Sargent's work (J. Phys. Chem. Lett. 2019, 10, 419-426, J. Am. Chem. Soc. 2017, 139, 1432-1435) to quantify the charge transfer time. In more detail, we consider the rising part of TA kinetics (Figure 3c, f, i) as a charge transfer process, and a single exponential fitting model is used here to extract charge transfer time.

**Transient photovoltage (TPV) measurements:** In TPV measurements, the device was held at open-circuit under steady-state conditions controlled by a continuous white light bias and a small pulsed perturbation of excess charge carriers produced by a laser beam (470 nm). The device connected to the oscilloscope (1M  $\Omega$  input impedance). The lifetime ( $\tau$ ) was calculated by fitting a single exponential function to the transient photovoltage or transient photocurrent decay curves.

**Bilayer hole-only devices characterization (SCLC).** SCLC was carried out for the hole-only device, with the structure of ITO/PTAA/PFN-Br/GA<sub>0.2</sub>BA<sub>1.8</sub>MA<sub>5</sub>Pb<sub>6</sub>I<sub>19</sub>/PTAA/MoO<sub>3</sub>/Ag. The defect density could be calculated by the Mott-Gurney law:

$$J = \frac{9}{8} \epsilon_r \epsilon_0 \mu \frac{V^2}{L^3} \quad (2)$$

Here,  $\epsilon$  and  $\epsilon_0$  are the dielectric constants of perovskite and the vacuum permittivity, respectively.  $L$  is the thickness of the obtained perovskite film, about 300 nm in this study.  $e$  is the elementary charge, and  $V_{TFL}$  is the trap-filled limit voltage. When  $\epsilon$  is constant,  $N_{defects}$  is in direct proportion to  $V_{TFL}$ .

**Time-of-flight secondary-ion mass spectrometry (TOF-SIMS).** The TOF-SIMS spectra were conducted on a TOF-SIMS V instrument (Ion-TOF, GmbH, Germany) to track the depth distributions of Cl<sup>-</sup>, I<sup>-</sup> and In<sup>3+</sup> from the top of perovskite film down to ITO substrate. Dual beam depth profiling used a pulsed 30keV Bi<sub>3</sub><sup>++</sup> liquid metal ion gun as a primary ion source and a 10 keV Argon gas cluster ion beam with the beam current being lowered to 1 nA as a sputtering ion source in an interlaced mode. At first, the sputter beam was used to sputter the sample surface for 20 s to clean possible contamination on the sample surface during sample preparation. Then, data were collected until we reached the ITO layer as indicated by the sharp increase in the InO<sup>-</sup> ion intensity. The analysis area was 100×100  $\mu\text{m}^2$  in the center of a crater of 300×300  $\mu\text{m}^2$ . A low energy flood gun was used for charge compensation during analysis. The spectra were obtained in a high current bunched mode and mass calibrated using Cl<sup>-</sup>, I<sup>-</sup> and InO<sup>-</sup>. The amount and distribution of Cl<sup>-</sup> (I<sup>-</sup>) inside the perovskite layer can be illustrated by the relative intensity of Cl<sup>-</sup> (I<sup>-</sup>), until the enhancement of the relative intensity of InO<sup>-</sup> signal. All geometries of intermediates were optimized under tight criteria using BHandH/6-31G(d,p) method. Frequency calculations confirmed that the intermediates on ground state had zero imaginary frequency. All calculations were performed using Gaussian 16 program software.

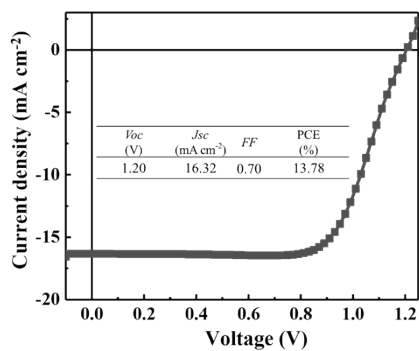

**Figure S1.** *J-V* curve and photovoltaic parameters of the  $\text{BA}_2\text{MA}_3\text{Pb}_4\text{I}_{13}$  based device after heat-light co-treatment.

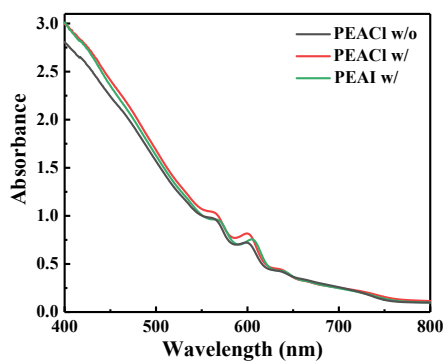

**Figure S2.** UV-Vis absorption spectra of the PEACl w/o, PEACl w/, and PEAl w/-based perovskite films.

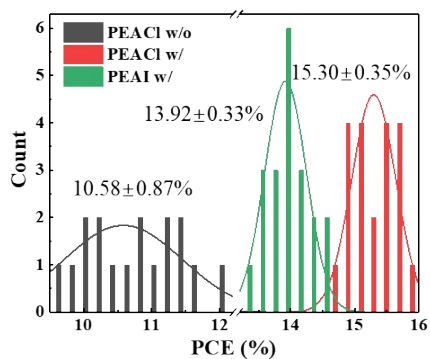

**Figure S3.** PCE histograms of 20 devices of the PEACl w/o, PEACl w/, and PEAl w/-based PVSCs.

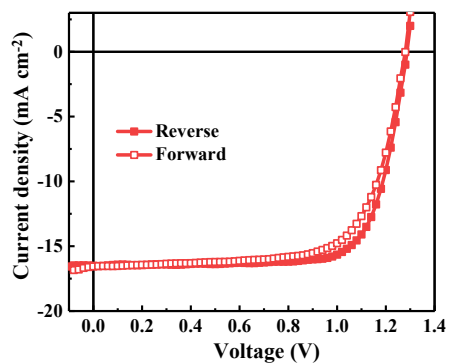

**Figure S4.** The forward-reverse  $J$ - $V$  curves of the PEACl w/-based champion PVSC.

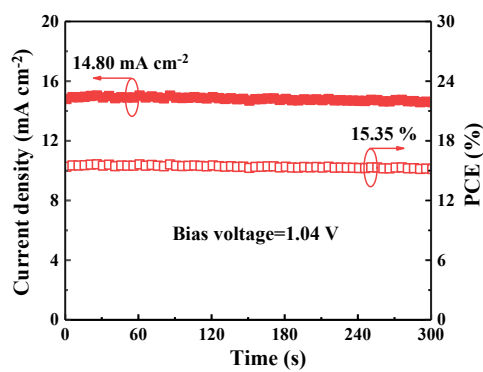

**Figure S5.** Stabilized photocurrent measurement of the PEACl w/-based champion PVSC under 1 sun AM 1.5G continuous illumination.

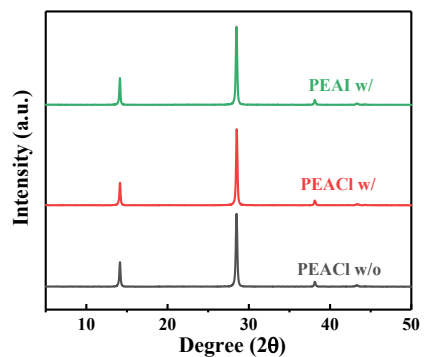

**Figure S6.** XRD patterns of PEACl w/o, PEACl w/, and PEAI w/-based perovskite films, using  $\text{CuK}\alpha$  X-radiation.

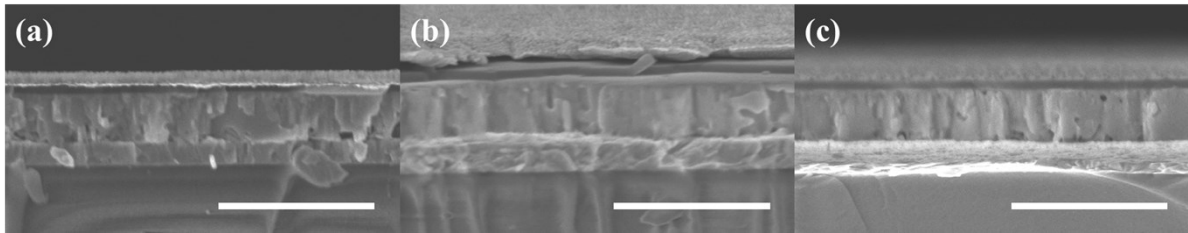

**Figure S7.** The top-view SEM images of the (a) PEACl w/o, (b) PEACl w/ and (c) PEAI w/ perovskite films (The scale bar is 1 mm).

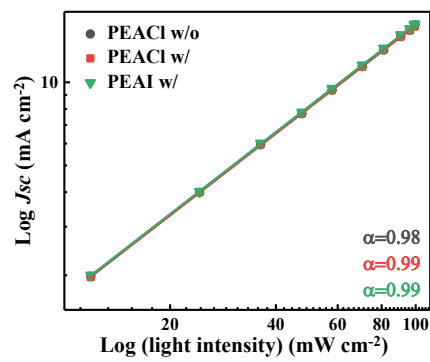

**Figure S8.** Log/ $J_{sc}$  vs. Log(light intensity) (dots), together with linear fits (solid lines) to the data, for the PEACl w/o, PEACl w/, and PEAI w/ -based devices.

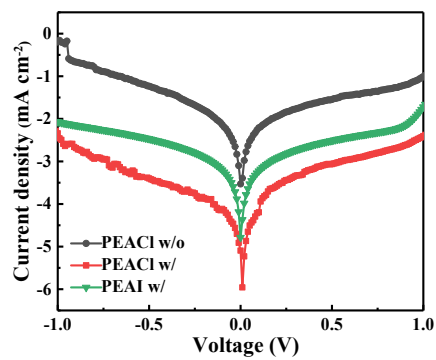

**Figure S9.**  $J$ - $V$  curves in the dark of the PEACl w/o, PEACl w/, and PEAI w/ -based PVSCs.

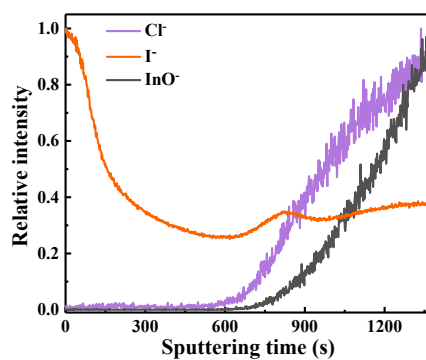

**Figure S10.** TOF-SIMS profiles showing Cl<sup>-</sup> and I<sup>-</sup> of the PEA<sub>0.2</sub>BA<sub>1.8</sub>MA<sub>3</sub>Pb<sub>4</sub>I<sub>13</sub> films from the top of the perovskite film to the bottom for the PEACl w/ based perovskite film.

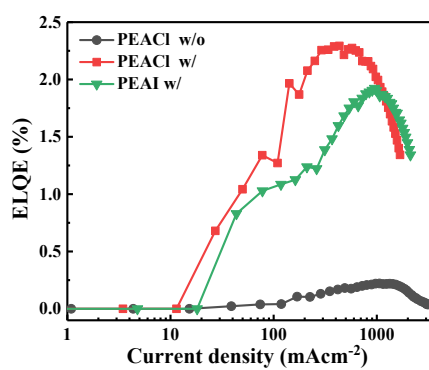

**Figure S11.** ELQE as a function of injection current density for the PEACl w/o, PEACl w/, and PEAI w/ -based devices

**Table S1.** Reported quasi-2D PVSCs with high  $V_{oc}$ .

| $V_{oc}$<br>(V) | $J_{sc}$<br>( $\text{mA cm}^{-2}$ ) | $FF$ | PCE<br>(%) | $E_g^a)$<br>(eV) | Energy loss<br>(V) | Ref       |
|-----------------|-------------------------------------|------|------------|------------------|--------------------|-----------|
| 1.24            | 19.86                               | 0.70 | 17.26      | 1.69             | 0.45               | 1         |
| 1.16            | 19.00                               | 0.79 | 17.34      | 1.61             | 0.45               | 2         |
| 1.22            | 17.91                               | 0.82 | 18.04      | 1.65             | 0.43               | 3         |
| 1.17            | 16.90                               | 0.81 | 15.86      | 1.66             | 0.49               | 4         |
| 1.23            | 13.61                               | 0.72 | 12.07      | 1.68             | 0.45               | 5         |
| 1.19            | 15.80                               | 0.75 | 14.10      | 1.64             | 0.45               | 6         |
| 1.13            | 18.63                               | 0.77 | 16.26      | 1.62             | 0.49               | 7         |
| 1.14            | 22.26                               | 0.73 | 18.48      | 1.64             | 0.50               | 8         |
| 1.07            | 19.55                               | 0.75 | 15.75      | 1.61             | 0.54               | 9         |
| 1.23            | 15.85                               | 0.75 | 14.68      | 1.68             | 0.45               | 10        |
| 1.09            | 21.77                               | 0.75 | 18.06      | 1.61             | 0.52               | 11        |
| 1.24            | 20.89                               | 0.66 | 17.25      | 1.62             | 0.38               | 12        |
| 1.21            | 17.97                               | 0.76 | 16.53      | 1.68             | 0.47               | 13        |
| 1.29            | 16.51                               | 0.74 | 15.81      | 1.65             | 0.36               | This work |

a) The bandgap is calculated according to the PL spectra.

**Table S2.** Summary of the photovoltaic parameters of the PEACl w/o, PEAl w/o, PEACl w/, and PEAl w/ -based PVSCs.

|           | $V_{oc_{ave}}$<br>(V) | $PCE_{ave}$<br>(%) | $J_{cal}$<br>( $\text{mA cm}^{-2}$ ) |
|-----------|-----------------------|--------------------|--------------------------------------|
| PEACl w/o | 1.16±0.02             | 10.58±0.87         | 14.43                                |
| PEAl w/o  | 1.15±0.02             | 10.72±0.65         | 14.42                                |
| PEACl w/  | 1.28±0.01             | 15.30±0.35         | 16.49                                |
| PEAl w/   | 1.24±0.01             | 13.92±0.33         | 16.06                                |

**Table S3.** The forward-reverse  $J$ - $V$  character of the PEACl w/ -based champion PVSC.

|         | $V_{oc}$<br>(V) | $FF$ | $J_{sc}$<br>( $\text{mA cm}^{-2}$ ) | PCE<br>(%) | HI (%) |
|---------|-----------------|------|-------------------------------------|------------|--------|
| Reverse | 1.29            | 0.74 | 16.51                               | 15.81      | 6.3    |
| Forward | 1.28            | 0.70 | 16.56                               | 14.81      |        |

**Table S4.** The charge transfer time of small-n to large-n of the PEACl w/o, PEACl w/, and PEAl w/ -based perovskite films, derived by fitting the carrier dynamics via a single exponential equation.

| Sample       | PEACl w/o (ps) | PEACl w/ (ps) | PEAI w/ (ps) |
|--------------|----------------|---------------|--------------|
| n=2 → n=3    | 0.40±0.01      | 0.30±0.04     | 0.29±0.01    |
| n=3 → n=4    | 0.48±0.01      | 0.48±0.03     | 0.40±0.04    |
| Small → n= ∞ | 60.87±5.35     | 28.43±2.99    | 28.41±4.60   |

**Table S5.** Comparison of experimental XRD data for two characteristic peaks of the PEACl w/o, PEACl w/, and PEAI w/ - based perovskite films.

| Ratio     | Plane           | (111) (14.1°)       | (202) (28.4°)       |
|-----------|-----------------|---------------------|---------------------|
| PEACl w/o | FWHM (°)        | 0.172               | 0.209               |
|           | Intensity (cps) | 2.9×10 <sup>4</sup> | 8.5×10 <sup>4</sup> |
| PEACl w/  | FWHM (°)        | 0.184               | 0.203               |
|           | Intensity (cps) | 2.3×10 <sup>4</sup> | 8.9×10 <sup>4</sup> |
| PEAI w/   | FWHM (°)        | 0.187               | 0.228               |
|           | Intensity (cps) | 2.6×10 <sup>4</sup> | 8.0×10 <sup>4</sup> |

**Table S6.** Carrier recombination lifetime of the PEACl w/o, PEACl w/, and PEAI w/ based devices.

| Sample        | PEACl w/o | PEACl w/  | PEAI w/   |
|---------------|-----------|-----------|-----------|
| Lifetime (μs) | 2.62±0.02 | 3.02±0.03 | 2.84±0.03 |

## References

- 1 G. Wu, X. Li, J. Zhou, J. Zhang, X. Zhang, X. Leng, P. Wang, M. Chen, D. Zhang, K. Zhao, S. F. Liu, H. Zhou and Y. Zhang, *Adv. Mater.*, 2019, **31**, 1903889.
- 2 J. Shi, Y. Gao, X. Gao, Y. Zhang, J. Zhang, X. Jing and M. Shao, *Adv. Mater.*, 2019, **31**, 1901673.
- 3 J. Zhang, J. J. Qin, M. S. Wang, Y. J. Bai, H. Zou, J. K. Keum, R. M. Tao, H. X. Xu, H. M. Yu, S. Haacke and B. Hu, *Joule*, 2019, **3**, 3061-3071.
- 4 X. Lian, J. Chen, Y. Zhang, S. Tian, M. Qin, J. Li, T. R. Andersen, G. Wu, X. Lu and H. Chen, *J. Mater. Chem. A*, 2019, **7**, 18980-18986.
- 5 J. Chen, X. Lian, Y. Zhang, W. Yang, J. Li, M. Qin, X. Lu, G. Wu and H. Chen, *J. Mater. Chem. A*, 2018, **6**, 18010-18017.
- 6 W. F. Fu, J. Wang, L. J. Zuo, K. Gao, F. Liu, D. S. Ginger and A. K. Y. Jen, *ACS Energy Lett.*, 2018, **3**, 2086-2093.
- 7 X. Lian, J. Chen, Y. Zhang, M. Qin, T. R. Andersen, J. Ling, G. Wu, X. Lu, D. Yang and H. Chen, *J. Mater. Chem. A*, 2019, **7**,



19423-19429.

- 8 T. Luo, Y. Zhang, Z. Xu, T. Niu, J. Wen, J. Lu, S. Jin, S. F. Liu and K. Zhao, *Adv. Mater.*, 2019, **31**, 1903848.
- 9 D. Lu, G. Lv, Z. Xu, Y. Dong, X. Ji and Y. Liu, *J. Am. Chem. Soc.*, 2020, **142**, 11114-11122.
- 10 Y. Qin, H. Zhong, J. J. Intemann, S. Leng, M. Cui, C. Qin, M. Xiong, F. Liu, A. K. Y. Jen and K. Yao, *Adv. Energy Mater.*, 2020, **10**, 1904050.
- 11 H. Ren, S. Yu, L. Chao, Y. Xia, Y. Sun, S. Zuo, F. Li, T. Niu, Y. Yang, H. Ju, B. Li, H. Du, X. Gao, J. Zhang, J. Wang, L. Zhang, Y. Chen and W. Huang, *Nat. Photonics*, 2020, **14**, 154-163.
- 12 Z. Xu, D. Lu, F. Liu, H. Lai, X. Wan, X. Zhang, Y. Liu and Y. Chen, *ACS Nano*, 2020, **14**, 4871-4881.
- 13 T. He, S. Li, Y. Jiang, C. Qin, M. Cui, L. Qiao, H. Xu, J. Yang, R. Long, H. Wang and M. Yuan, *Nat. Commun.*, 2020, **11**, 1672.
